# Supplementary material for: Long term absence of invasive breast cancer diagnosis in 2,402,672 pre and postmenopausal women: A systematic review and meta-analysis
Source: PLoS One. 2020 Sep 10;15(9):e0237925. doi: 10.1371/journal.pone.0237925 (PMC7482842; doi:10.1371/journal.pone.0237925)
Supplement: S1 Table — (XLSX) [file pone.0237925.s001.xlsx]

## Sheet: Sheet1
The PRISMA for Abstracts Checklist
TITLE	CHECKLIST ITEM	REPORTED ON PAGE #
1. Title:	Identify the report as a systematic review, meta-analysis, or both.	1
BACKGROUND
2. Objectives:	The research question including components such as participants, interventions, comparators, and outcomes.	3-5
METHODS
3. Eligibility criteria:	Study and report characteristics used as criteria for inclusion	4
4. Information sources:	Key databases searched and search dates.	4, S2-S3Tables, S1Text
5. Risk of bias:	Methods of assessing risk of bias.	2,4-5,9,15
RESULTS
6. Included studies:	Number and typed of included studies and participants and relevant characteristics of studies	6-10
7. Synthesis of results:	Results for main outcomes (benefits and harms), preferably indicating the number of studies and participants for each. If meta-analysis was done, include summary measures and confidence intervals.	10-14
8. Description of the effect:	Direction of the effect (i.e. which group is favoured) and size of the effect in terms meaningful to clinicians and patients.	15-16
DISCUSSION
9. Strengths and Limitations of evidence:	Brief summary of strengths and limitations of evidence (e.g. inconsistency, imprecision, indirectness, or risk of bias, other supporting or conflicting evidence)	16-19
10. Interpretation:	General interpretation of the results and important implications	16-19
OTHER
11. Funding:	Primary source of funding for the review.	Supplement statement
12. Registration:	Registration number and registry name.	see 2-5
